Articles of interest in other COB journals

From *Journal of Cell Science*

**The integrin  $\alpha 9\beta 1$  is a receptor for nerve growth factor and other neurotrophins**

Izabela Staniszewska, Ilker K. Sariyer, Shimon Lecht, Meghan C. Brown, Erin M. Walsh, George P. Tuszynski, Mahmut Safak, Philip Lazarovici and Cezary Marcinkiewicz

Staniszewska, I. et al. 2008. *J. Cell Sci.* doi: 10.1242/jcs.000232

**Functional interactions between POPX2 phosphatase and mDia modulate RhoA pathways**

Yi Xie, E-Jean Tan, Shimei Wee, Edward Manser, Louis Lim and Cheng-Gee Koh

Xie, Y. et al. 2008. *J. Cell Sci.* doi: 10.1242/jcs.013557
